# Supplementary material for: Energy flow in peptides after UV photoexcitation of backbone linkages
Source: Royal Society of Chemistry journal article supplement (doi:10.1039/c7cp01768e), 2017-01-01
Supplement: c7cp01768e1.pdf [file c7cp01768e1.pdf]

**B3LYP/6-311++G(2d,p) // B3LYP/6-31G(d)**

**Frequencies in  $\text{cm}^{-1}$ , zero-point kinetic energies (ZKEs) and energies (Es) in Hartrees.  
The energies are not corrected for ZKE.**

**AP<sup>+</sup>(CE) parent ion:**

Charge: 1+; Spin state: Singlet

Geometry:

O,0,-3.7777505407,2.2169901773,-1.0375091942

N,0,0.769381306,-0.0312046221,-0.1332981201

C,0,-0.4294078135,-0.0351291735,-1.0334968604

C,0,-1.2827139434,-1.260649809,-0.6621897452

O,0,-0.7369117855,-2.2651943861,-0.20885728

C,0,0.0289097687,-0.1026917361,-2.4956820704

C,0,-3.4754569066,-2.3603068562,-0.5902160702

N,0,-2.6166951519,-1.1934230509,-0.8916361204

C,0,-3.3648661457,-0.0763354848,-1.4713812081

C,0,-3.6793875811,1.0095931453,-0.4411381001

O,0,-3.8688742907,0.8261135615,0.7398864644

C,0,-4.6796247724,-0.75406666,-1.936951223

C,0,-4.8945321351,-1.8563698386,-0.8873426252

H,0,-4.0599134806,2.8539923021,-0.3529243365

H,0,1.2057965976,0.906486519,-0.1422968926

H,0,0.5171955697,-0.254649512,0.8499583025

H,0,1.4782132236,-0.7210199922,-0.4417009903

H,0,-0.9572794428,0.8964667095,-0.8237398675

H,0,0.7347687689,0.7027772991,-2.7174338707

H,0,-0.823071069,-0.013755916,-3.175183872

H,0,0.5206710449,-1.0618411288,-2.6846606747

H,0,-3.1821827816,-3.1990442851,-1.2315592718

H,0,-3.3309927434,-2.6682847464,0.4480559726

H,0,-2.8378207081,0.3797586072,-2.312171219  
H,0,-4.5142500975,-1.185483779,-2.929980475  
H,0,-5.5089317486,-0.0457613774,-2.011653475  
H,0,-5.5483346809,-2.6540590097,-1.2484207509  
H,0,-5.3416652296,-1.4334709284,0.0171539316  
O,0,1.5747433394,2.8234625532,0.1181947365  
C,0,2.3521495638,3.3801917356,-0.9397912099  
C,0,3.5758405661,2.5153822924,-1.1546520909  
O,0,3.1600127266,1.2307708949,-1.5931876064  
H,0,2.6756482835,4.3970727932,-0.6733071136  
H,0,1.758076147,3.4422239044,-1.8640809533  
H,0,4.2244970104,2.9915910316,-1.9066210777  
H,0,4.1438939944,2.4365581405,-0.2151410505  
C,0,-1.3366432756,1.2779182708,2.692695878  
O,0,-0.7595601622,1.9082742374,1.5464389043  
O,0,0.0961433957,-0.6384082176,2.6255470586  
C,0,-0.3451825066,0.4234319871,3.4658108372  
H,0,-2.1471709427,0.6529266051,2.3124601286  
H,0,-1.7720440557,2.0308054848,3.3656808333  
H,0,0.5167110602,1.0111940873,3.817886771  
H,0,-0.8514934611,0.013283438,4.3531065852  
C,0,3.5796953201,-2.5823006283,-0.5177702853  
O,0,2.8740601318,-1.6618890529,-1.3558860888  
O,0,2.1981803496,-2.2077875441,1.387347049  
C,0,2.6046298125,-3.2030508185,0.4589727647  
H,0,4.3805506353,-2.0712595306,0.0343856944  
H,0,4.0309625325,-3.3700710763,-1.1377963405  
H,0,1.7355762681,-3.6047543698,-0.0806388607  
H,0,3.1069270818,-4.0339729896,0.97995178

C,0,0.5130666812,3.6729196698,0.5491249747  
H,0,0.9021386109,4.6828335824,0.7448924423  
H,0,-0.2618345831,3.7498136304,-0.2287383761  
C,0,-0.0798828434,3.122863834,1.8293072583  
H,0,0.7268896914,2.9718871566,2.5607747015  
H,0,-0.7813465104,3.863264042,2.2452222524  
C,0,0.915230902,-1.5901849772,3.3066457298  
H,0,0.3582957852,-2.0088448729,4.1576778879  
H,0,1.821948772,-1.1024176471,3.6943476497  
C,0,1.2909901526,-2.7104868572,2.361017164  
H,0,1.767398638,-3.5151303342,2.943863165  
H,0,0.3913765155,-3.1108855765,1.8764603259  
C,0,3.6926067695,-0.9856711572,-2.3112249113  
H,0,4.520459912,-1.6344905883,-2.6266236467  
H,0,3.0609798443,-0.7951917998,-3.184316474  
C,0,4.2451908256,0.3338512206,-1.7976213507  
H,0,4.9449504413,0.743627837,-2.5436665095  
H,0,4.8037835454,0.1910239973,-0.8592694765

Vibrational frequencies:

|          |          |          |
|----------|----------|----------|
| 17.4791  | 31.2641  | 36.6658  |
| 40.2301  | 43.1958  | 50.9659  |
| 63.5361  | 74.5116  | 79.7512  |
| 88.4023  | 94.8508  | 99.7383  |
| 106.4700 | 117.5367 | 127.4217 |
| 131.9619 | 137.1096 | 141.7034 |
| 145.6297 | 157.7989 | 163.0418 |
| 166.3531 | 174.6095 | 188.4218 |
| 208.7899 | 226.9394 | 232.1257 |

|           |           |           |
|-----------|-----------|-----------|
| 240.1993  | 259.2097  | 266.2393  |
| 266.6630  | 268.4359  | 285.6821  |
| 298.8309  | 305.0806  | 314.1401  |
| 317.4600  | 326.4458  | 331.9337  |
| 347.0895  | 358.8580  | 386.3335  |
| 396.0703  | 399.6450  | 414.4945  |
| 465.8787  | 513.0385  | 518.6406  |
| 528.8829  | 540.8922  | 550.9391  |
| 578.0880  | 580.2712  | 582.0510  |
| 636.3722  | 651.5916  | 719.4135  |
| 744.4153  | 769.3111  | 823.1689  |
| 829.4266  | 833.9207  | 843.2669  |
| 854.4799  | 856.9737  | 858.4007  |
| 876.1191  | 885.4878  | 897.5102  |
| 922.8784  | 924.7279  | 931.7408  |
| 948.1482  | 953.1285  | 964.3653  |
| 973.4813  | 977.5652  | 983.0621  |
| 1000.7287 | 1020.5836 | 1039.4475 |
| 1059.5575 | 1060.4150 | 1072.6704 |
| 1078.5613 | 1089.1202 | 1103.8894 |
| 1109.7245 | 1115.8516 | 1123.2965 |
| 1124.2076 | 1130.0294 | 1133.8520 |
| 1139.2867 | 1143.1562 | 1148.5482 |
| 1158.1742 | 1160.7499 | 1167.3825 |
| 1169.5501 | 1172.9099 | 1175.4325 |
| 1178.1260 | 1194.2151 | 1201.0006 |
| 1213.7885 | 1225.3686 | 1258.5820 |
| 1268.0068 | 1269.1970 | 1271.3072 |
| 1275.9864 | 1280.4207 | 1284.9347 |

|           |           |           |
|-----------|-----------|-----------|
| 1288.2570 | 1303.6918 | 1310.1587 |
| 1317.8055 | 1322.5000 | 1323.4081 |
| 1330.5057 | 1341.0124 | 1344.6186 |
| 1346.5267 | 1354.6782 | 1377.2206 |
| 1390.0095 | 1394.5033 | 1399.1747 |
| 1401.6794 | 1403.7008 | 1415.7355 |
| 1425.2966 | 1428.6353 | 1434.9013 |
| 1444.0635 | 1445.0010 | 1448.0913 |
| 1464.6162 | 1465.9255 | 1480.5743 |
| 1483.8863 | 1488.7184 | 1512.6143 |
| 1518.1526 | 1518.9018 | 1522.3471 |
| 1523.0562 | 1524.0193 | 1524.4276 |
| 1525.4560 | 1526.0018 | 1534.6378 |
| 1535.6768 | 1541.2792 | 1543.4519 |
| 1546.4884 | 1546.7062 | 1548.0753 |
| 1548.8924 | 1635.2320 | 1691.4692 |
| 1704.5690 | 1756.5819 | 1845.6650 |
| 3000.3978 | 3004.4254 | 3006.0519 |
| 3008.4323 | 3009.1115 | 3009.9251 |
| 3013.6026 | 3019.0219 | 3021.2128 |
| 3026.8866 | 3037.1900 | 3037.3297 |
| 3045.5315 | 3046.1043 | 3051.3244 |
| 3054.4430 | 3058.0050 | 3060.3327 |
| 3060.8627 | 3062.7161 | 3073.4126 |
| 3073.9976 | 3075.5162 | 3081.3402 |
| 3084.0491 | 3094.0548 | 3119.7254 |
| 3122.0512 | 3129.9529 | 3134.9438 |
| 3136.3108 | 3148.3455 | 3153.5666 |
| 3154.9574 | 3155.0993 | 3223.0496 |

3287.1357      3325.5298      3677.8590

ZKE = 0.619656

E = -1572.4237424

**AP<sup>+</sup> fragment:**

Charge: 1+; Spin state: Singlet

Geometry:

O,0,-4.4326621946,1.7956315918,-0.4268366282  
N,0,0.2475707284,0.3048690568,-0.0634067724  
C,0,-0.3939039547,-0.0137040682,-1.4027704742  
C,0,-1.2873279717,-1.2225673776,-1.0369845533  
O,0,-0.7105577411,-2.1640827544,-0.4908069575  
C,0,0.6703228886,-0.3899880716,-2.4286312735  
C,0,-3.44403844,-2.382880017,-0.982830451  
N,0,-2.6053758996,-1.1978724299,-1.3134635055  
C,0,-3.4217032633,-0.0133869155,-1.6141841617  
C,0,-3.3732901724,0.9913629509,-0.4457323749  
O,0,-2.448444099,1.0882174542,0.3461592626  
C,0,-4.8167010026,-0.6133685159,-1.8900867706  
C,0,-4.8716826271,-1.8240182657,-0.9455105135  
H,0,-4.3260072682,2.4380335546,0.3032462698  
H,0,1.0497103333,0.9389377971,-0.1317102822  
H,0,-0.4874557632,0.7147905025,0.5379951689  
H,0,0.5413408094,-0.6017696894,0.3389314712  
H,0,-0.9373579932,0.882250153,-1.6960548712  
H,0,1.3734876735,0.433721054,-2.5936914823  
H,0,0.187069631,-0.608170518,-3.38570293

H,0,1.2148599489,-1.284727447,-2.1146436565  
H,0,-3.3100582425,-3.1356011002,-1.7667441825  
H,0,-3.1083049136,-2.8158549604,-0.0385537895  
H,0,-3.0508938033,0.5234409975,-2.4966220431  
H,0,-4.8537795887,-0.9367613677,-2.9352784233  
H,0,-5.6150104215,0.1118164811,-1.7298058636  
H,0,-5.610733778,-2.5653214067,-1.2573885285  
H,0,-5.131690875,-1.5043926882,0.0703343164

Vibrational frequencies:

|           |           |           |
|-----------|-----------|-----------|
| 50.0771   | 75.6360   | 101.9159  |
| 110.1735  | 135.9395  | 179.8911  |
| 186.7758  | 251.8846  | 268.4306  |
| 292.3670  | 314.8364  | 329.2706  |
| 364.3288  | 380.6325  | 429.4913  |
| 445.3428  | 523.4299  | 562.7744  |
| 601.8740  | 662.0795  | 703.6824  |
| 727.5211  | 755.5183  | 818.0182  |
| 844.6931  | 873.9164  | 882.0628  |
| 919.6475  | 933.8416  | 950.2725  |
| 981.1828  | 988.8824  | 1014.3700 |
| 1068.8409 | 1096.6800 | 1119.6135 |
| 1131.7353 | 1188.6642 | 1196.1039 |
| 1210.7008 | 1224.6005 | 1238.2779 |
| 1278.4580 | 1298.4957 | 1337.4628 |
| 1346.3931 | 1355.6940 | 1374.1980 |
| 1385.2967 | 1396.1251 | 1417.5864 |
| 1441.7352 | 1474.5921 | 1486.3093 |
| 1513.5911 | 1520.5664 | 1527.3375 |

|           |           |           |
|-----------|-----------|-----------|
| 1529.7767 | 1546.1147 | 1645.5824 |
| 1713.6608 | 1757.3016 | 1795.2104 |
| 3060.3857 | 3068.7592 | 3073.4669 |
| 3085.9557 | 3095.4003 | 3141.4371 |
| 3143.5682 | 3151.8334 | 3157.1864 |
| 3172.4537 | 3180.3607 | 3306.5145 |
| 3370.0209 | 3497.4214 | 3661.2954 |

ZKE = 0.244774

E = -649.0757382

**CE fragment:**

Charge: zero; Spin multiplicity: Singlet

Geometry:

O,0,1.7536760266,2.9356934257,0.3657942712  
C,0,2.4326489431,3.383646027,-0.7875328671  
C,0,3.6254454553,2.4839461745,-1.0486782896  
O,0,3.1767481285,1.2449811881,-1.5542689221  
H,0,2.7891060354,4.4210100312,-0.6508032888  
H,0,1.7679077979,3.3709360653,-1.6664354261  
H,0,4.2977810599,2.9788265593,-1.7730254473  
H,0,4.1873649467,2.3465585533,-0.1103472976  
C,0,-1.4178047184,1.2425898438,2.5452253721  
O,0,-0.7580984229,1.9100055546,1.4868543442  
O,0,-0.0872350065,-0.7412415801,2.6378071498  
C,0,-0.5092056884,0.3671073615,3.4014234941  
H,0,-2.1728481988,0.6025383202,2.0769156199  
H,0,-1.9371866481,1.9646964991,3.1989865319



H,0,0.3592377842,0.9414554302,3.7652223705  
H,0,-1.0753873349,0.0361410563,4.292430529  
C,0,3.5926887189,-2.4801505729,-0.4119690048  
O,0,2.8455201912,-1.6944784661,-1.318850405  
O,0,2.1896120077,-2.1871304564,1.4998397481  
C,0,2.6437933181,-3.1445636422,0.5671817826  
H,0,4.318478159,-1.8770146928,0.1546817426  
H,0,4.1553806702,-3.2604944145,-0.9553863812  
H,0,1.8005729323,-3.5859928646,0.0119593566  
H,0,3.1752977566,-3.9658478893,1.0819549161  
C,0,0.5971921612,3.6914050696,0.6560105625  
H,0,0.8644240913,4.7421059299,0.8718931262  
H,0,-0.0996810901,3.6904647255,-0.1975198797  
C,0,-0.0973013558,3.100015821,1.8678420078  
H,0,0.6539915559,2.9210832586,2.6521752669  
H,0,-0.8251457471,3.8329100425,2.2602799962  
C,0,0.7838020657,-1.6010369136,3.3406783132  
H,0,0.2690492314,-2.0504119755,4.2094113955  
H,0,1.6605293877,-1.0504379633,3.7192092503  
C,0,1.2523653325,-2.7089850103,2.4169365902  
H,0,1.7078441401,-3.5129906837,3.0235716968  
H,0,0.3830874758,-3.1370426239,1.8919134494  
C,0,3.626889032,-0.992286224,-2.2660528298  
H,0,4.4445681304,-1.6286966559,-2.6468137911  
H,0,2.9572735623,-0.7618668663,-3.1012716617  
C,0,4.2188174768,0.3146112145,-1.7495492256  
H,0,4.945839291,0.6912964201,-2.4935553909  
H,0,4.7732773455,0.1496619235,-0.8105207752

Vibrational frequencies:

|           |           |           |
|-----------|-----------|-----------|
| 34.0640   | 37.2238   | 51.4173   |
| 57.9214   | 71.4459   | 97.3413   |
| 128.5194  | 128.7727  | 145.2496  |
| 146.2132  | 154.6355  | 168.4576  |
| 191.8658  | 204.9853  | 220.0933  |
| 223.6937  | 257.0172  | 286.5672  |
| 301.8034  | 302.8370  | 320.5183  |
| 352.1493  | 389.0786  | 393.2067  |
| 506.1469  | 510.8512  | 536.5080  |
| 552.8672  | 585.3018  | 587.8197  |
| 837.6307  | 845.8303  | 859.4954  |
| 859.8586  | 867.9475  | 878.2624  |
| 921.1144  | 945.3369  | 958.4547  |
| 966.7630  | 976.9719  | 979.2194  |
| 1069.4363 | 1077.2460 | 1085.8246 |
| 1092.3508 | 1108.2722 | 1112.9806 |
| 1118.6861 | 1133.1380 | 1148.4950 |
| 1149.2621 | 1165.6084 | 1171.3235 |
| 1173.9742 | 1176.5698 | 1186.2346 |
| 1188.9184 | 1196.4792 | 1196.7725 |
| 1265.5029 | 1265.6799 | 1276.7634 |
| 1277.3519 | 1284.2087 | 1285.6685 |
| 1313.6859 | 1318.0827 | 1320.9065 |
| 1324.7081 | 1344.6725 | 1344.7598 |
| 1389.3450 | 1400.6921 | 1403.5202 |
| 1415.8947 | 1423.2964 | 1431.7929 |
| 1443.7486 | 1446.1642 | 1463.8228 |
| 1465.4799 | 1483.6655 | 1484.3198 |

|           |           |           |
|-----------|-----------|-----------|
| 1507.5668 | 1507.5761 | 1522.2907 |
| 1522.8422 | 1524.5141 | 1524.7248 |
| 1537.8458 | 1537.9600 | 1550.3165 |
| 1550.5638 | 1551.8046 | 1552.3288 |
| 2951.3401 | 2951.4184 | 2955.6618 |
| 2955.6958 | 2959.9496 | 2960.1192 |
| 2972.3583 | 2973.0242 | 2977.4118 |
| 2977.5037 | 2987.2299 | 2988.4509 |
| 3002.3837 | 3002.4974 | 3008.3829 |
| 3008.4740 | 3016.3830 | 3016.4469 |
| 3023.8028 | 3024.1067 | 3035.3363 |
| 3035.7212 | 3104.9230 | 3104.9272 |

ZKE = 0.370545

E = -923.2754226

**a<sup>+</sup>(CE) fragment:**

Charge: 1+; Spin state: Doublet

Geometry:

N,0,0.8454138513,0.0998872768,-0.1107901752  
C,0,-0.3032837212,0.0442326118,-1.0114512797  
C,0,-0.0736258649,-0.2773504694,-2.4409095408  
H,0,1.2189012894,1.0724356054,-0.0307349334  
H,0,0.5795812939,-0.1932192746,0.8509910992  
H,0,1.6183370692,-0.5104121084,-0.4387273718  
H,0,-1.1636842223,0.5878961238,-0.6443436352  
H,0,0.5161352946,0.5053003956,-2.9482396249  
H,0,-1.0280407805,-0.3672690524,-2.9660935559

H,0,0.4790903511,-1.2183894045,-2.5578959466  
O,0,1.6829903233,2.8573493272,0.2556105746  
C,0,2.4768112568,3.4060451789,-0.7981796336  
C,0,3.6814449186,2.5183546991,-1.0276549435  
O,0,3.2412360495,1.2561417858,-1.5077512343  
H,0,2.8220005962,4.4113434222,-0.5173379498  
H,0,1.8831123921,3.4911935868,-1.7200659074  
H,0,4.3448817629,3.0025509361,-1.7610378348  
H,0,4.2417767402,2.3993282877,-0.0875880609  
C,0,-1.4362167904,1.2880224985,2.5640312418  
O,0,-0.7434413575,1.9392498219,1.5030597398  
O,0,-0.0469513493,-0.6691637046,2.561669779  
C,0,-0.5418538106,0.3795461447,3.3937375559  
H,0,-2.2194560637,0.687286716,2.0913283988  
H,0,-1.9199463713,2.0235424884,3.2227281459  
H,0,0.2974598315,0.9367436672,3.8370130283  
H,0,-1.1323845318,-0.0462968401,4.2188668585  
C,0,3.6269162965,-2.4845624797,-0.4020144881  
O,0,2.9073920268,-1.613583733,-1.278704323  
O,0,2.0914369105,-2.1819035855,1.3979197208  
C,0,2.646124757,-3.1614067509,0.5316525103  
H,0,4.3688852074,-1.9253914124,0.1840568895  
H,0,4.1524380161,-3.2485756891,-0.9920072822  
H,0,1.8560854437,-3.6602794018,-0.0506815114  
H,0,3.1795279858,-3.9313991093,1.1106728821  
C,0,0.6119834973,3.7151101206,0.6555020906  
H,0,1.0107542815,4.7081179674,0.9080013666  
H,0,-0.1125915901,3.8323851838,-0.1632829644  
C,0,-0.0680923041,3.1341017838,1.8775231001

H,0,0.6846495887,2.9430976172,2.6559813493  
H,0,-0.7864096961,3.870380216,2.2691259962  
C,0,0.7348812473,-1.6231169456,3.2816794726  
H,0,0.1319042455,-2.0608638768,4.0903494399  
H,0,1.6117722106,-1.133768611,3.7301514628  
C,0,1.1817675816,-2.7245825389,2.3446746215  
H,0,1.6678727399,-3.5147743627,2.9378118543  
H,0,0.3105598505,-3.1681033413,1.8382568434  
C,0,3.7166401573,-0.9558592198,-2.2597915256  
H,0,4.519217883,-1.6255486897,-2.5956378535  
H,0,3.0598226716,-0.7559364454,-3.1112928378  
C,0,4.3084334963,0.3532982137,-1.7638540517  
H,0,4.9806999514,0.7580394624,-2.5372890217  
H,0,4.907111387,0.1985759085,-0.8522135347

Vibrational frequencies:

|          |          |          |
|----------|----------|----------|
| 34.2900  | 40.0108  | 41.8034  |
| 65.9526  | 86.4107  | 91.2162  |
| 98.3987  | 104.3950 | 108.9270 |
| 134.4268 | 137.9801 | 146.5883 |
| 147.6308 | 152.4915 | 159.5467 |
| 163.6576 | 172.2379 | 202.1362 |
| 215.3365 | 230.1211 | 237.1464 |
| 250.5024 | 266.9939 | 271.0762 |
| 299.0097 | 306.6872 | 317.2826 |
| 324.5353 | 343.7868 | 385.5880 |
| 397.5950 | 421.7502 | 475.2332 |
| 503.1106 | 511.8157 | 517.4414 |
| 542.4285 | 550.8638 | 577.8511 |

|           |           |           |
|-----------|-----------|-----------|
| 579.6380  | 821.2465  | 831.9410  |
| 841.8284  | 852.3684  | 855.0597  |
| 885.6439  | 902.0275  | 924.3333  |
| 946.2394  | 950.8353  | 963.4679  |
| 976.6561  | 980.7504  | 1006.2591 |
| 1040.1324 | 1057.9043 | 1071.1396 |
| 1075.6121 | 1086.4079 | 1103.3924 |
| 1107.3921 | 1115.6350 | 1121.5285 |
| 1130.0223 | 1132.0750 | 1135.9051 |
| 1148.5687 | 1156.0324 | 1156.7064 |
| 1161.0992 | 1168.2511 | 1172.6381 |
| 1174.0064 | 1176.4049 | 1187.5311 |
| 1244.7007 | 1267.4146 | 1268.9217 |
| 1276.9759 | 1277.6398 | 1283.0828 |
| 1286.6588 | 1309.5730 | 1316.9884 |
| 1322.1483 | 1329.8249 | 1342.4851 |
| 1344.1419 | 1389.5843 | 1400.1210 |
| 1402.6796 | 1408.5421 | 1416.1224 |
| 1423.5208 | 1431.5500 | 1443.5045 |
| 1446.0102 | 1450.5864 | 1463.5639 |
| 1465.3188 | 1484.2121 | 1484.5199 |
| 1494.0765 | 1505.5192 | 1510.1045 |
| 1516.9306 | 1522.8497 | 1523.4190 |
| 1525.5215 | 1526.0016 | 1534.7069 |
| 1537.6391 | 1544.4674 | 1546.3031 |
| 1547.8286 | 1548.7719 | 1639.4525 |
| 1685.9245 | 1716.2262 | 2991.0406 |
| 3000.7415 | 3004.7422 | 3010.7086 |
| 3010.9822 | 3011.9591 | 3016.0656 |

|           |           |           |
|-----------|-----------|-----------|
| 3021.3214 | 3022.9044 | 3026.2923 |
| 3028.8950 | 3036.3589 | 3039.3513 |
| 3045.9026 | 3048.1297 | 3049.0476 |
| 3051.7914 | 3057.0808 | 3057.4100 |
| 3067.0694 | 3068.1814 | 3071.3305 |
| 3073.1958 | 3077.6073 | 3117.7653 |
| 3126.7137 | 3137.1121 | 3147.5800 |
| 3210.0225 | 3248.6738 | 3268.0927 |

ZKE = 0.468348

E = -1058.2821788

**x fragment:**

Charge: zero; Spin state: Doublet

Geometry:

O,0,-3.8648152692,2.1754777755,-1.1335294367  
C,0,-1.3108358516,-1.1985106434,-0.673992899  
O,0,-0.6412246324,-2.0645652416,-0.1667490139  
C,0,-3.5060985676,-2.375641117,-0.7061999806  
N,0,-2.6125826219,-1.2271558461,-0.9943366361  
C,0,-3.3137908367,-0.0899755933,-1.5763615484  
C,0,-3.6074606928,0.9885289531,-0.5324311902  
O,0,-3.653450918,0.8239718459,0.6637317174  
C,0,-4.6304500549,-0.7271225317,-2.0823631579  
C,0,-4.9026529236,-1.8331821123,-1.0446598244  
H,0,-4.0791799382,2.8055383072,-0.4194814243  
H,0,-3.2210533534,-3.2240426488,-1.3397357869

H,0,-3.39875606,-2.6774186281,0.3390312781  
H,0,-2.7333025764,0.359207477,-2.3863289349  
H,0,-4.4540707859,-1.1592872784,-3.0735643891  
H,0,-5.441038625,0.0009889853,-2.1705695422  
H,0,-5.5695442292,-2.6113850775,-1.4267330956  
H,0,-5.3620660632,-1.4016056258,-0.1497071353

Vibrational frequencies:

|           |           |           |
|-----------|-----------|-----------|
| 37.0529   | 48.4760   | 89.3670   |
| 156.2785  | 204.9685  | 264.2020  |
| 315.9214  | 376.1215  | 410.0339  |
| 507.5077  | 571.5472  | 617.3711  |
| 646.3068  | 742.7139  | 767.6182  |
| 824.2551  | 869.0836  | 890.8081  |
| 925.4737  | 925.9736  | 990.5302  |
| 1047.4514 | 1122.4664 | 1161.9157 |
| 1180.9950 | 1198.1930 | 1221.8282 |
| 1265.7223 | 1290.2852 | 1319.1596 |
| 1336.8981 | 1352.8335 | 1373.0664 |
| 1392.7900 | 1425.0993 | 1520.2416 |
| 1526.2227 | 1546.7296 | 1837.7843 |
| 1856.9831 | 3061.3921 | 3076.2200 |
| 3083.2919 | 3112.4219 | 3119.9156 |
| 3129.9866 | 3139.1050 | 3683.2572 |

ZKE = 0.142531

E = -514.0117667



## Supplementary info on rate constants

March 16, 2017

The calculation of the rate constants is made with the detailed balance formalism. As a reference we give the expression for evaporation of a single atom. It reads [V. Weisskopf, Phys. Rev. vol 52, 295 (1937).]

$$k(E, \varepsilon)d\varepsilon = \frac{mg\sigma\varepsilon}{\pi^2\hbar^3} \frac{\rho_p(E - \Delta E - \varepsilon)}{\rho_r(E)} d\varepsilon, \quad (1)$$

where  $\varepsilon$  is the kinetic energy release,  $m$  the reduced mass of the channel,  $g$  the degeneracy of the electronic state of the atom. The degeneracies for the reactant and the largest product are included in the vibrational level densities,  $\rho_r$  and  $\rho_p$  respectively.  $\sigma$  is the capture cross section for the inverse process and  $\Delta E$  is the activation energy for the evaporation process.

This is a well known result from nuclear physics where it was used by Weisskopf to describe decay of excited nuclei by neutron emission, and has also been used in the quantitative description of cluster decay, by emission of atoms, electrons and, with some modifications, also photons.

To convert Eq. 1 to one applicable to evaporative separation of larger fragments, we first make the simple change and include  $g$  into the relevant level density. Numerically this is minor change. Secondly we calculate the vibrational product level density as the convolution of the vibrational level densities of the two products, denoted by the subscripts  $p1$  and  $p2$ :

$$\rho_p(E) = \int_0^E \rho_{p1}(x)\rho_{p2}(E - x)dx \quad (2)$$

This is easily implemented by pooling the vibrational degrees of freedom of both products. This and all other calculations of vibrational level densities was done with the Beyer-Swinehart algorithm, as mentioned in the main text.

We now address the questions of the rotational degrees of freedom and of the magnitude of the capture cross section. These two are both related to the transition state. For all channels considered here, the products will consist of one cation and one neutral molecule. The interaction between the neutral product and the ion has a strength which is larger than the relevant collision energies, which are on the order of the thermal energies of the products. This makes the formation of a bound complex

in the reverse process collisions very likely, also in the cases where the attachment reaction does not immediately proceeds to the end with the resulting formation of the intact peptide. The formation of the parent ion in the reverse process from the formed complex then proceeds in competition with the statistical re-decay of the complex. We expect that geometric rearrangements have lower energy barriers than dissociation and that a complex-forming collision therefore will yield the parent ion with a considerably higher probability than given by considerations of steric factors and with values closer to the geometric cross sections.

Another effect that should be considered in the evaluation of the rate constant is the increased capture cross section due to the charge, on one fragment, and the dipole moment and the polarizability of the other, neutral fragment. This will increase the capture cross section compared to the purely geometric value, and thus introduce an approximation in the opposite direction of the one made by ignoring the re-evaporation discussed above. Both approximations will potentially change the rate constant by only a couple of orders of magnitude, and the fact that they have opposite effect means that we can use the geometric cross section to a reasonable accuracy.

What remains is to include the rotational degrees of freedom into the rate constant. Some theory is available in the literature but it still requires a not insignificant amount of theoretical development. The problem arises by the presence of three angular momenta after the decay; an intrinsic rotation for each of the fragments and one orbital angular momentum. The orbital angular momentum is related to the capture cross section and the translational kinetic energy release and need no further consideration. The other two are the angular momenta associated with the rotational motion of the isolated fragments (we ignore spin in this connection).

We expect these will have little influence on the branching ratio. This follows from considerations of the possible limiting cases of the theory of the rate constants that include the angular momenta. Two extreme cases must bracket the exact value. One extreme is the complete absence of any effect of the rotations. The first limit corresponds to multiplication of the ratio of level densities with the trivial factor unity squared and has no effect. The other is a multiplication of the level densities with the canonical rotational partition functions of the two freely rotating fragments, calculated at the product temperature. This follows from a freely populated rotational manifold during the break-up process. The convolution of the rotational and vibrational level densities yields the rotational partition function as a multiplicative factor. For details

see my book. This can amount to a significant correction for individual rate constants. However, when one takes the ratio of two different rate constants that involve fragments of similar size, mass, and disintegration energy, these factors tend to cancel. This is so because the moments of inertia of the fragments are similar, and the similar value of the (microcanonical) temperature in the two processes. In both limits, the angular momenta corrections to the rate constants therefore cancels at least approximately and we therefore expect that we can calculate the ratios of the rate constants with good confidence by simply ignoring any angular momentum correction to the rate constants themselves.

Similarly, the remaining parts of the frequency factors, given by Eq. 1 are similar in the same cases. The branching ratio,  $B$ , is then simply given by the ratio of product vibrational level densities, i.e.

$$B_{1,2} \approx \frac{\rho_1(E - \Delta E_1)}{\rho_2(E - \Delta E_2)}, \quad (3)$$

where the subscripts refer to the channel considered.

A numerical example of the rate constant for crown ether loss is shown in the main text. The factor on the atomic evaporation rate constant is arbitrarily set to  $10^6$ . In a classical treatment of the fragment rotational partition functions this corresponds to the product of all six principal axes rotational partition functions;

$$Z_{1,2}^{rot} = \left( \frac{T^6}{T_{1,x}T_{1,y}T_{1,z}T_{2,x}T_{2,y}T_{2,z}} \right)^{1/2}, \quad (4)$$

where  $T_{i,x}$  is the rotational constants (in units of temperature) of the first principal axis of fragment  $i$  etc., and  $T$  is the product microcanonical temperature. The factor  $10^6$  then corresponds to a geometric average of  $T/T_{i,x} = 100$ . For comparison is the rotational constant of  $C_2$  equal to 5 K.
